# Supplementary material for: Accurate diagnosis of mismatch repair deficiency in colorectal cancer using high-quality DNA samples from cultured stem cells
Source: PubMed Central journal article supplement (PMC6331025; doi:10.18632/oncotarget.26495), 2018-12-25
Supplement: oncotarget-09-37534-s001.pdf [file oncotarget-09-37534-s001.pdf]

## Accurate diagnosis of mismatch repair deficiency in colorectal cancer using high-quality DNA samples from cultured stem cells

### SUPPLEMENTARY MATERIALS

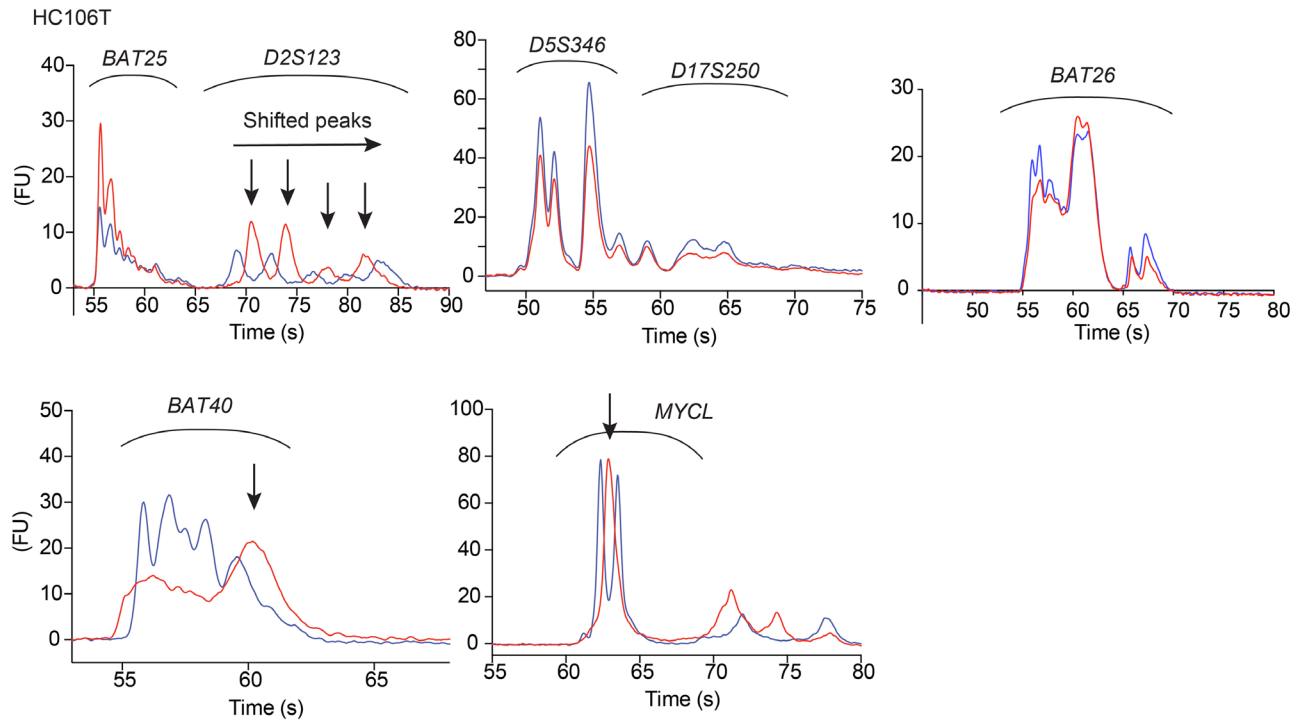

**Supplementary Figure 1: Representative shifted peak patterns in electropherogram of cancer cell DNA samples from those of normal cells.** In *D2S123*, the peaks for the cancer cells shifted to the right although the peak patterns between the normal (blue) and cancer cells (red) were similar. These shifted peaks reflect DNA fragment length changes caused by base-insertion mutations. Note that additional mononucleotide repeat markers *BAT40* and *MYCL* also showed shifted peaks in the cancer cell DNA sample.

**A**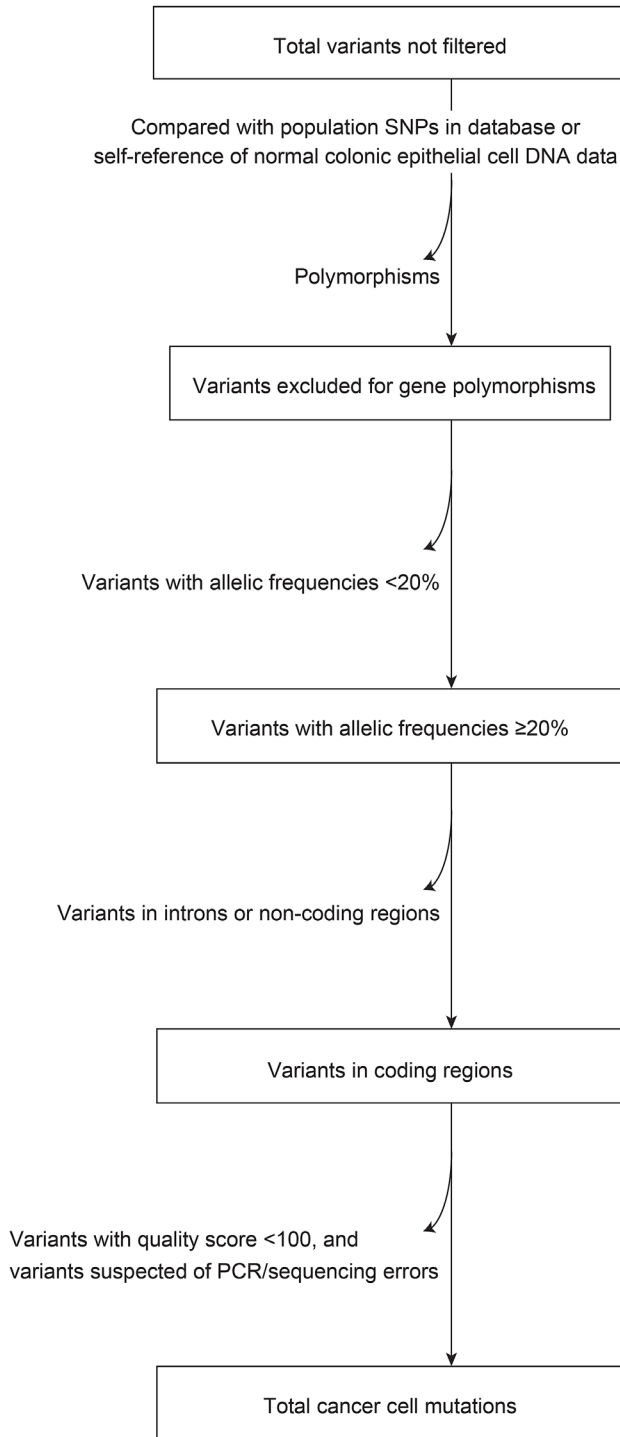**B**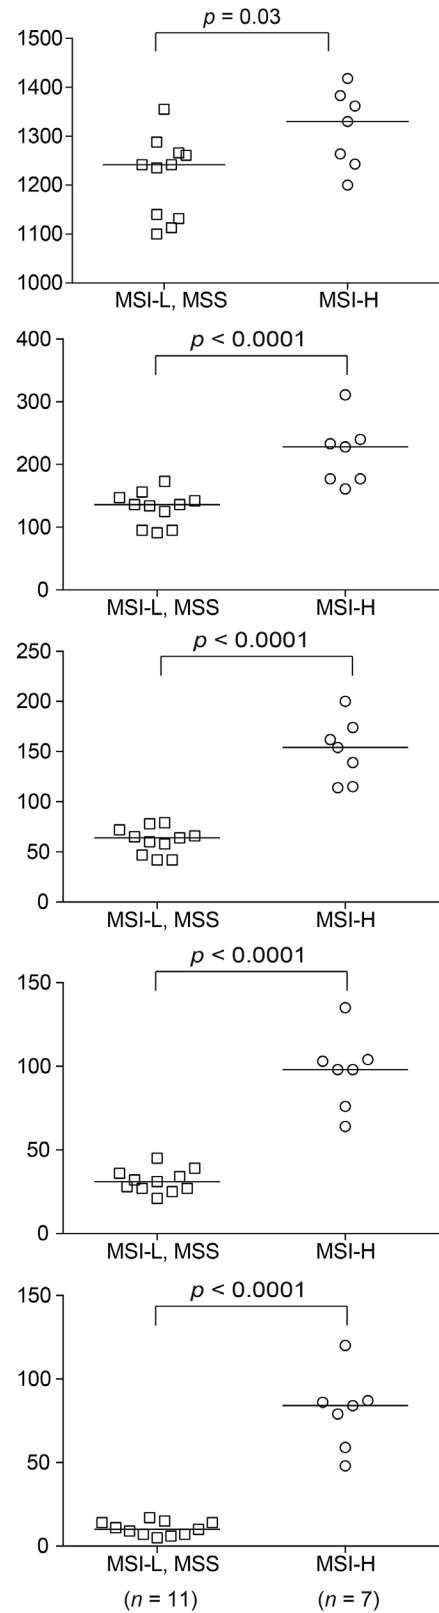

**Supplementary Figure 2: Mutational burden assessment of NGS data through filtering of variants.** (A) Filtering diagram for mutational burden estimation using the reference SNP database of a healthy local population (see Materials and Methods). (B) Effects of filtering at the respective steps on the apparent mutational burden compared between the MSI-L/MSS and MSI-H cases. Horizontal bars indicate the median values. The ordinate indicates the number of variants/mutations.

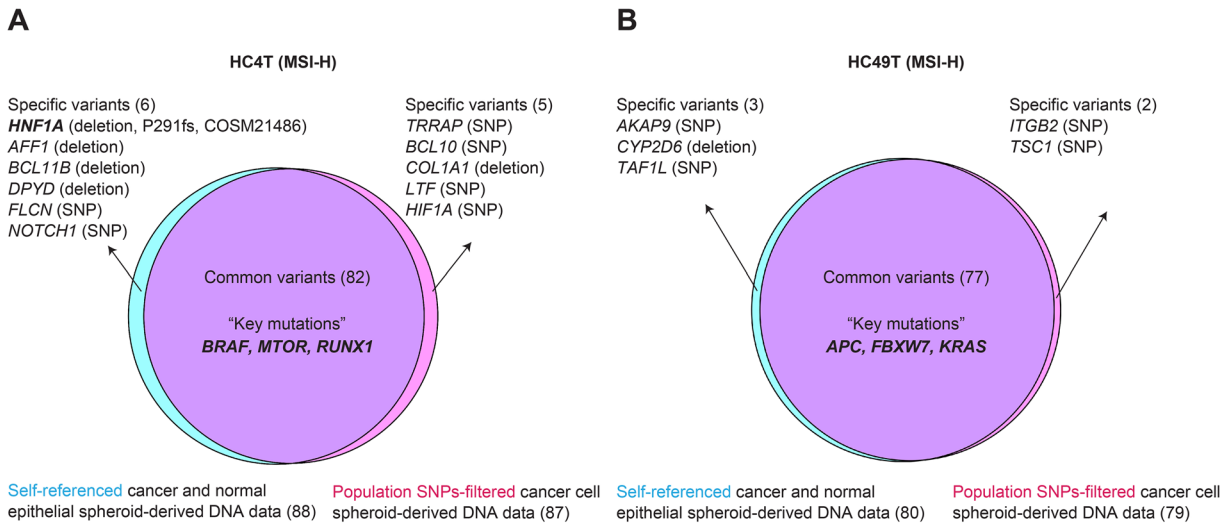

**Supplementary Figure 3: Comparison of mutational burden data filtering methods between self-DNA referring and population-based SNP-database referring.** (A, B) Two MSI-H colon cancer cases HC4T (A) and HC49T (B) were analyzed using two methods. In self DNA referring of NSG data using paired DNA samples of normal and cancer cells, variant data of the cancer spheroids were subtracted with those of the normal colonic epithelial spheroids from the same patients (left). Note that the mutations in the key cancer-related genes such as *BRAF* and *APC* were identical between the two methods. In the population-based SNPs method, variant data of cancer genome were subtracted with those of a healthy local population database (right).

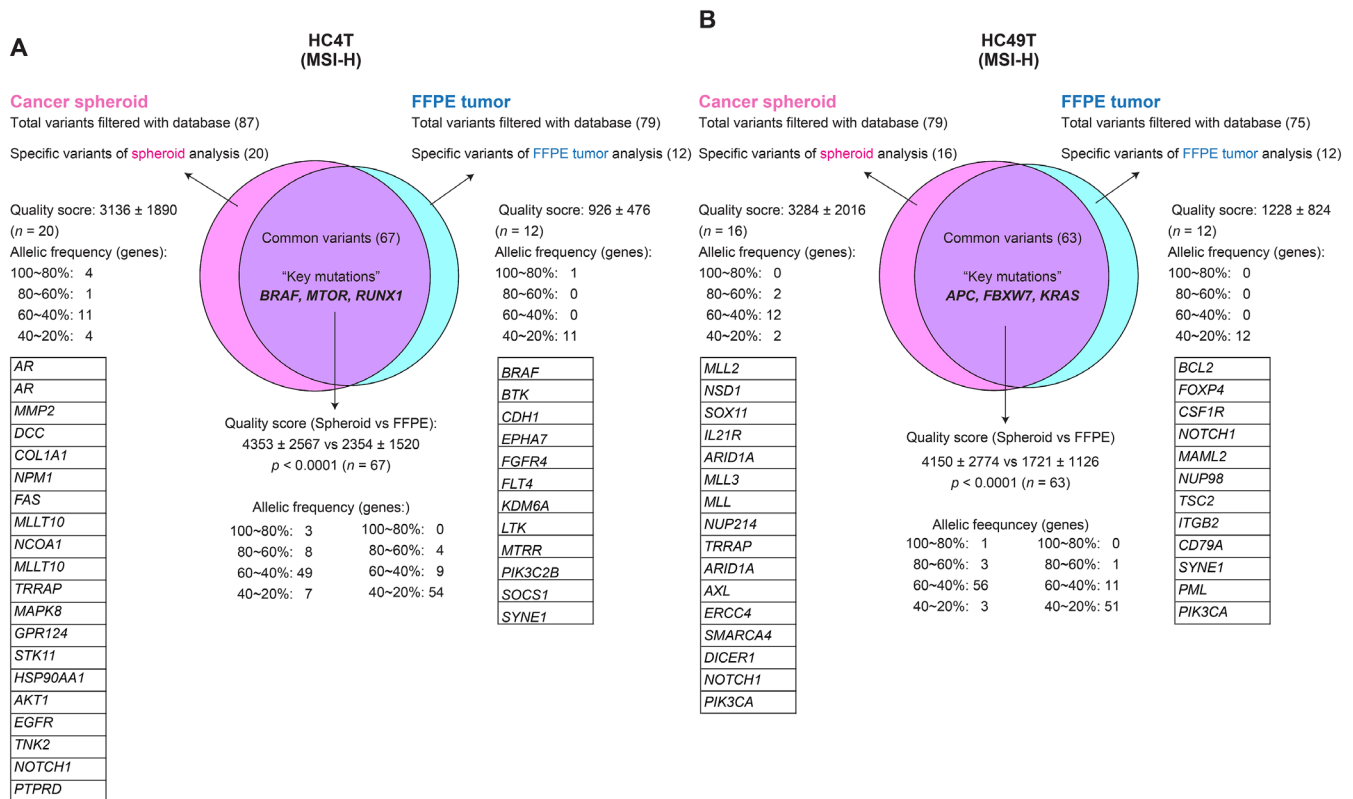

**Supplementary Figure 4: Comparison of mutational burden data between the spheroid- and FFPE tumor-derived DNA samples.** (A, B) NSG analysis of spheroid DNA (left) and FFPE tumor DNA (right) samples. Two MSI-H colon cancer cases HC4T (A) and HC49T (B) were analyzed as in Supplementary Figure 3 above. Note the significantly higher quality score of variants with spheroid-derived DNA samples than FFPE-tumor derived ones, and that the allelic frequency was also significantly higher with the spheroid-derived DNA. The mutations in the key cancer-related genes such as *BRAF* (V600E) and *APC* were identical between the two sources, and more numbers of variants were found in the spheroid DNA samples than in the FFPE tumor samples. An additional *BRAF* mutation A29fs was detected in HC4T FFPE tumor.

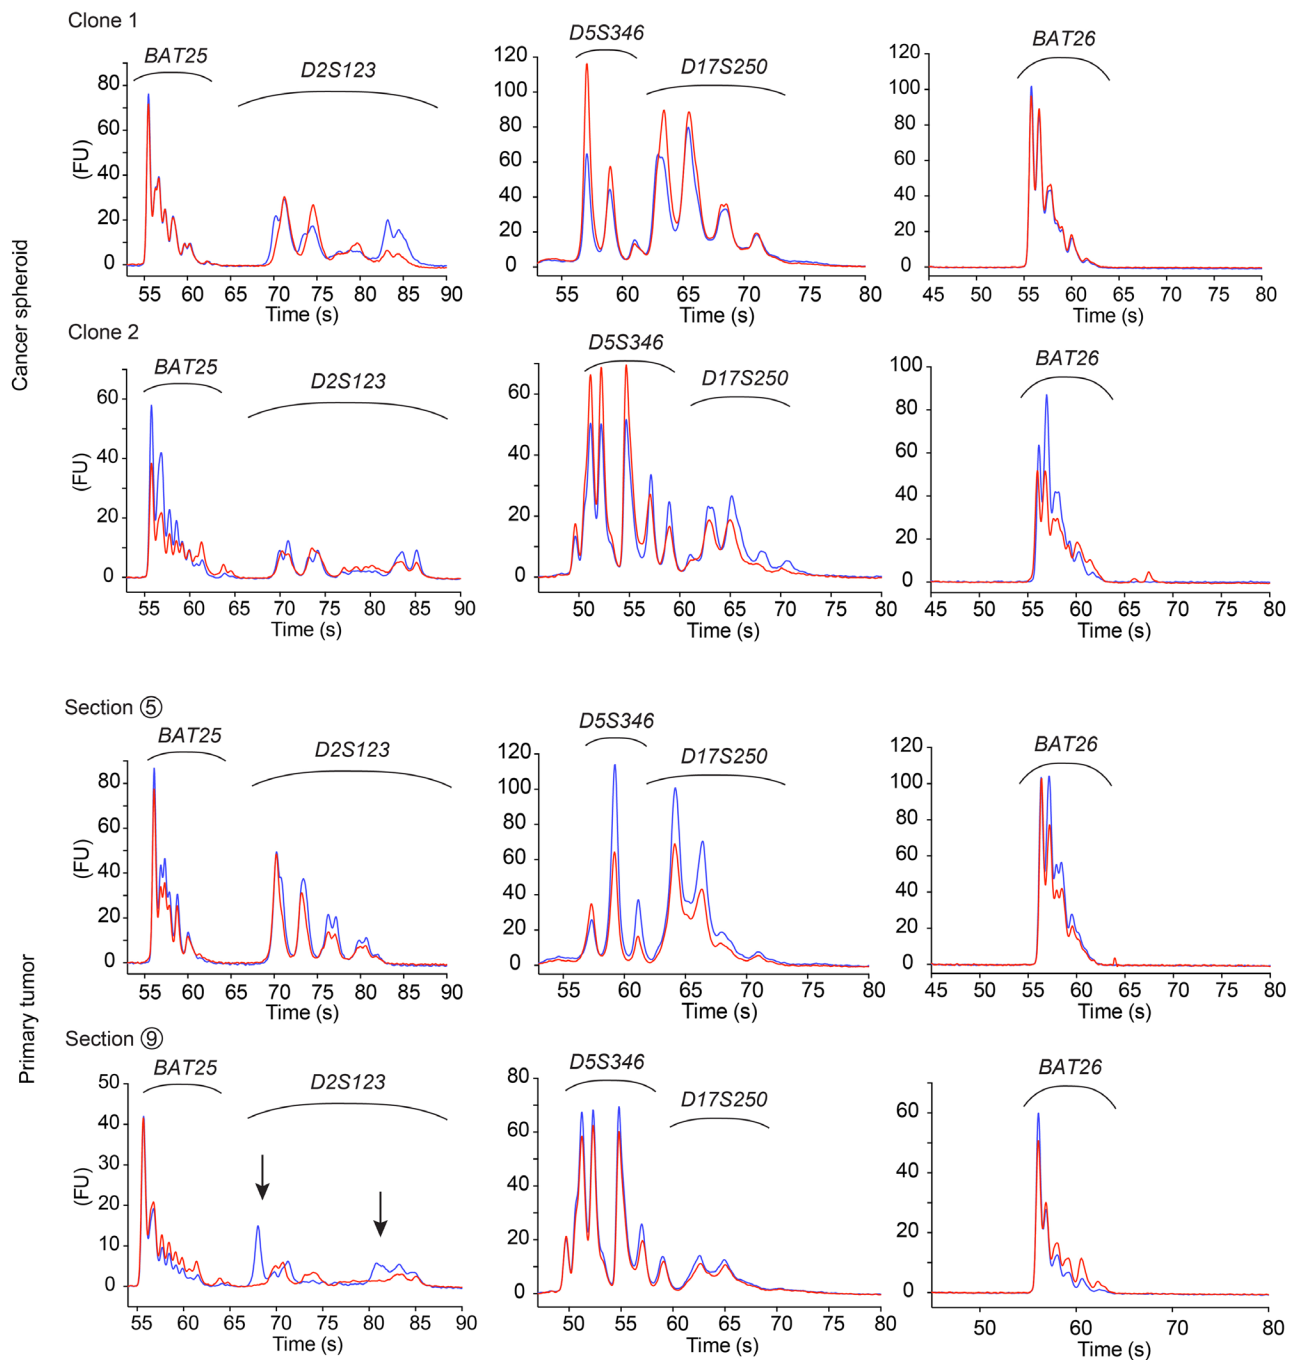

**Supplementary Figure 5: On-chip analysis of colon cancer HC13T DNA samples extracted from its spheroid cell lines and from FFPE tumor tissues.** For both independently isolated cancer spheroid lines (Clone 1 and Clone 2) isolated from this particular case HC13T, the on-chip electrophoresis of MMR target markers showed identical patterns to their normal epithelial spheroids. Likewise, DNA samples extracted from two separate sub-lesions of the primary tumor (Section 5 and 9; See Supplementary Figure 6) showed MSS and MSI-L.

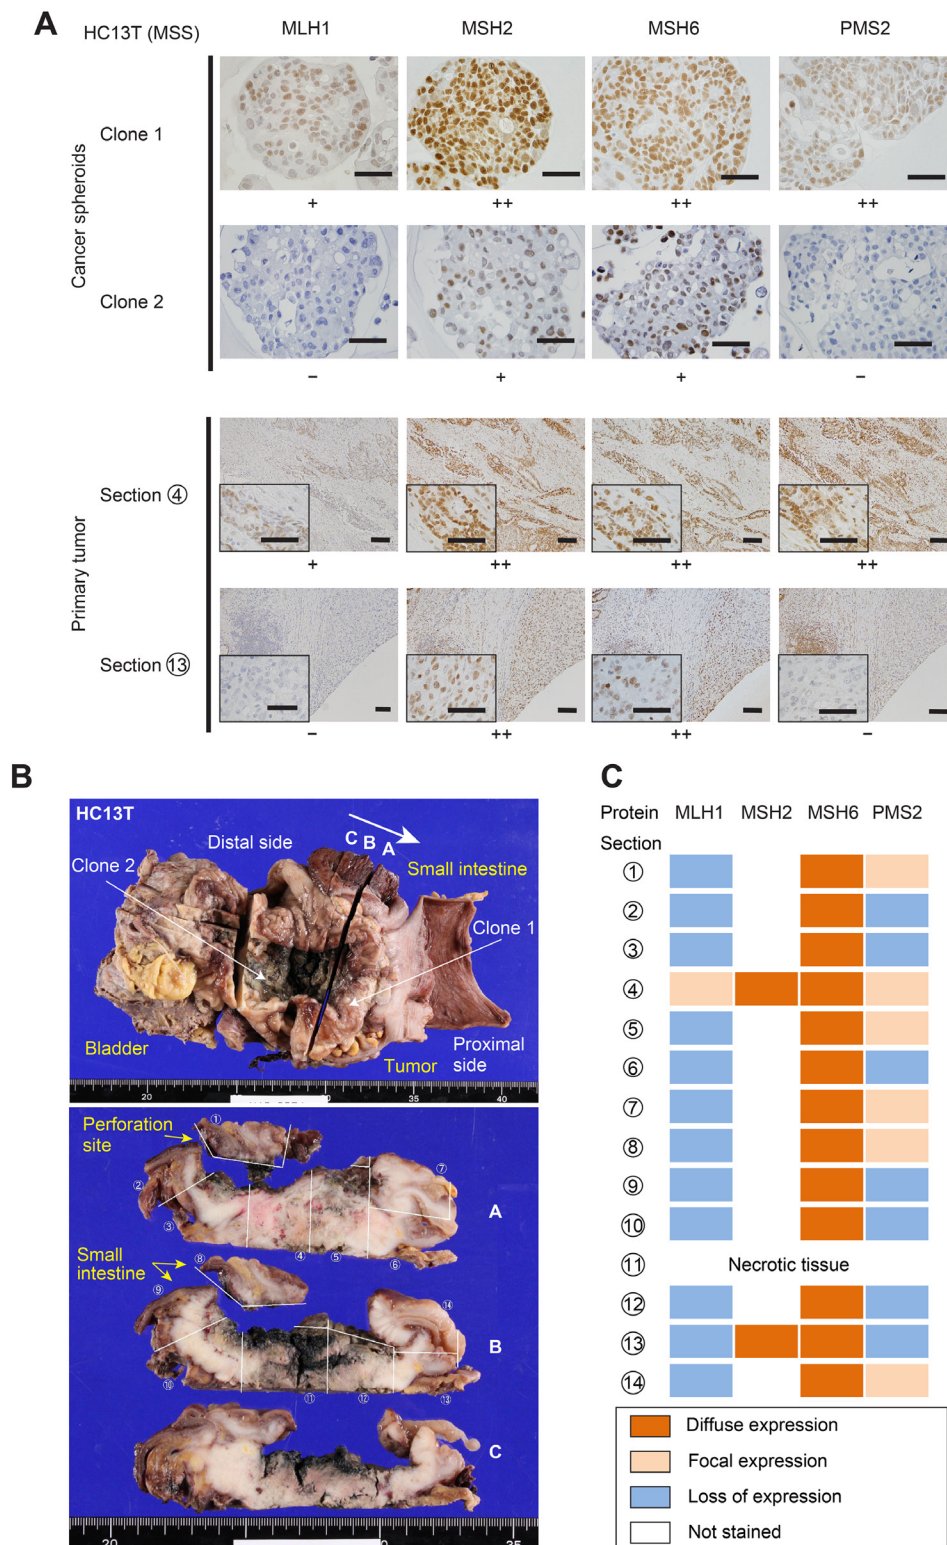

**Supplementary Figure 6: Immunohistochemistry of a colon cancer HC13T that showed different results between DNA analyses and IHC of MMR proteins.** (A) Upon IHC of the two independent spheroid lines of HC13T (see Supplementary Figure S5 above), they showed discrepant results each other. Although FFPE spheroids of Clone 1 was stained for all four MMR proteins, those of Clone 2 lacked staining for MLH1 and PMS2 (top rows). Likewise, sub-lesions of the primary tumor sections also showed different staining results for the MMR proteins. For example, Section 4 had all four MMR proteins, whereas Section 13 lacked MLH1 and PMS2 (bottom rows). (B) Macroscopic views of colon cancer case HC13T. Luminal view of the tumor containing colon in the rostro-caudal orientation (top), and three cross-sectional views at A, B, and C shown in top view (bottom). Sections obtained for IHC are indicated by encircled numbers. (C) Schematic summary of the IHC results for three MMR proteins, MLH1, MSH6, and PMS2 for 14 sub-lesions shown in B. As a reference, MSH2 was also stained for two sections (Sections 4 and 13). Note that Section 11 was necrotic and unanalyzable.

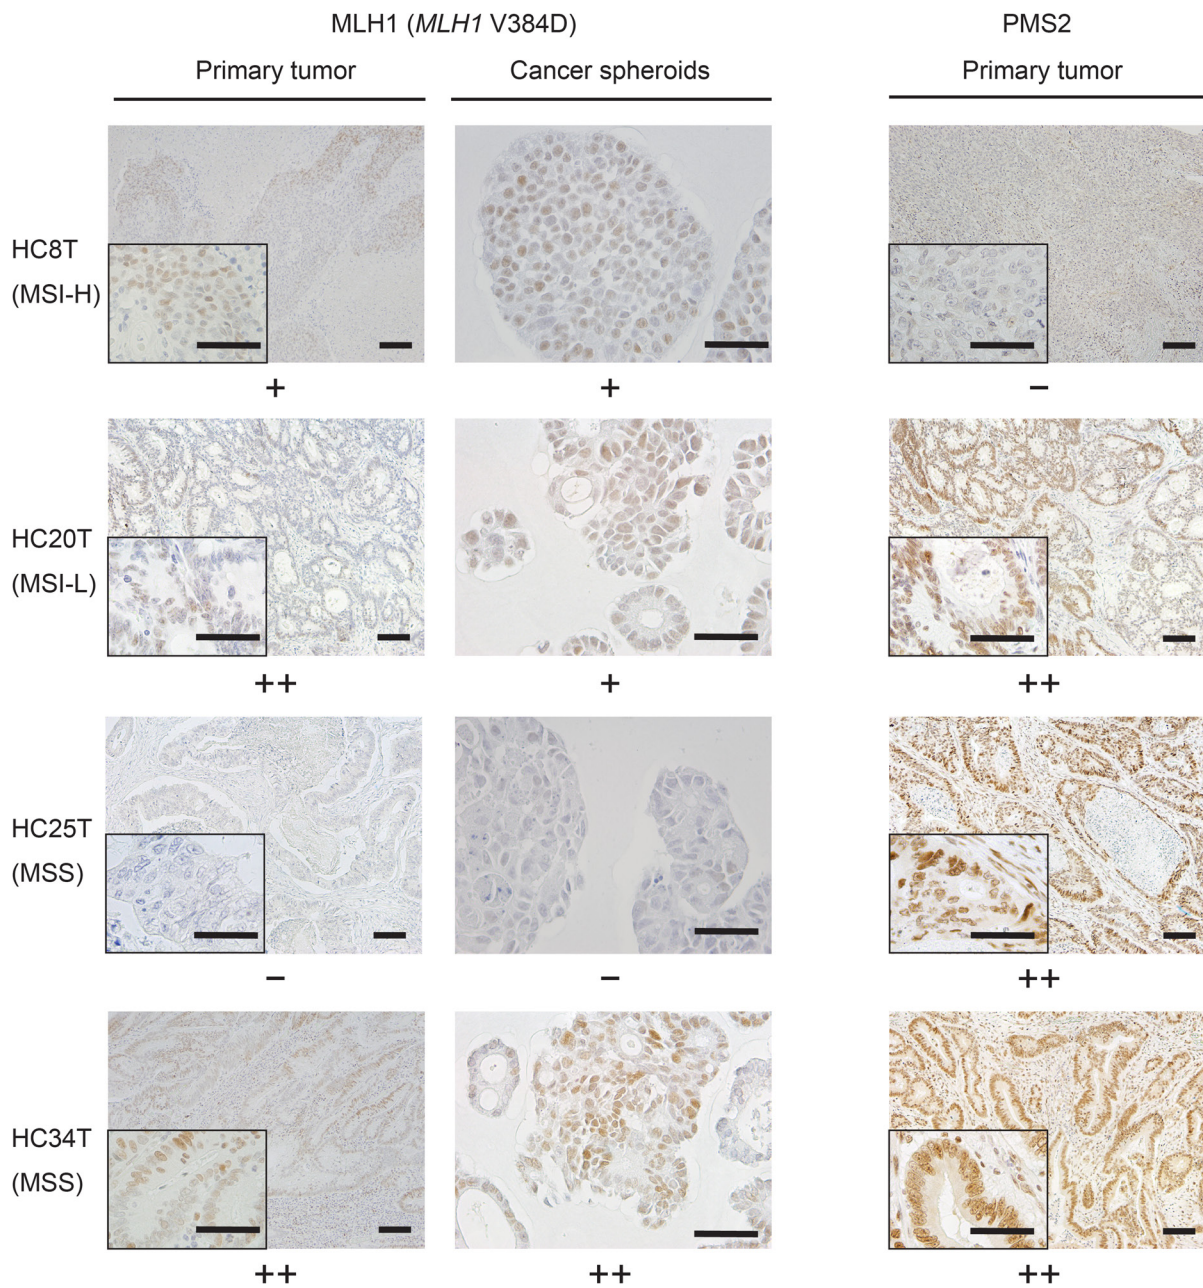

**Supplementary Figure 7: IHC analysis of four *MLH1* V384D mutant colon cancer cells for *MLH1* and *PMS2* proteins.**

Apparent changes in *MLH1* immunoreactivity in some of the *MLH1* V384D mutation-carrying colon cancer cells. Although HC8T stained positive for *MLH1*, it was negative for *PMS2* (top row), and its DNA analyses indicated MSI-H (Table 2 and Figure 5B). On the other hand, HC25T tumor was positively stained for *PMS2* despite its negative staining for *MLH1* by IHC (third row). It was diagnosed as MSS by on-chip satellite marker DNA analysis. In two other cases (HC20T and HC34T; second and fourth rows, respectively), both *MLH1* and *PMS2* were detected by IHC, and DNA analyses indicated MSI-L and MSS (data not shown), despite carrying the V384D mutation of *MLH1*.

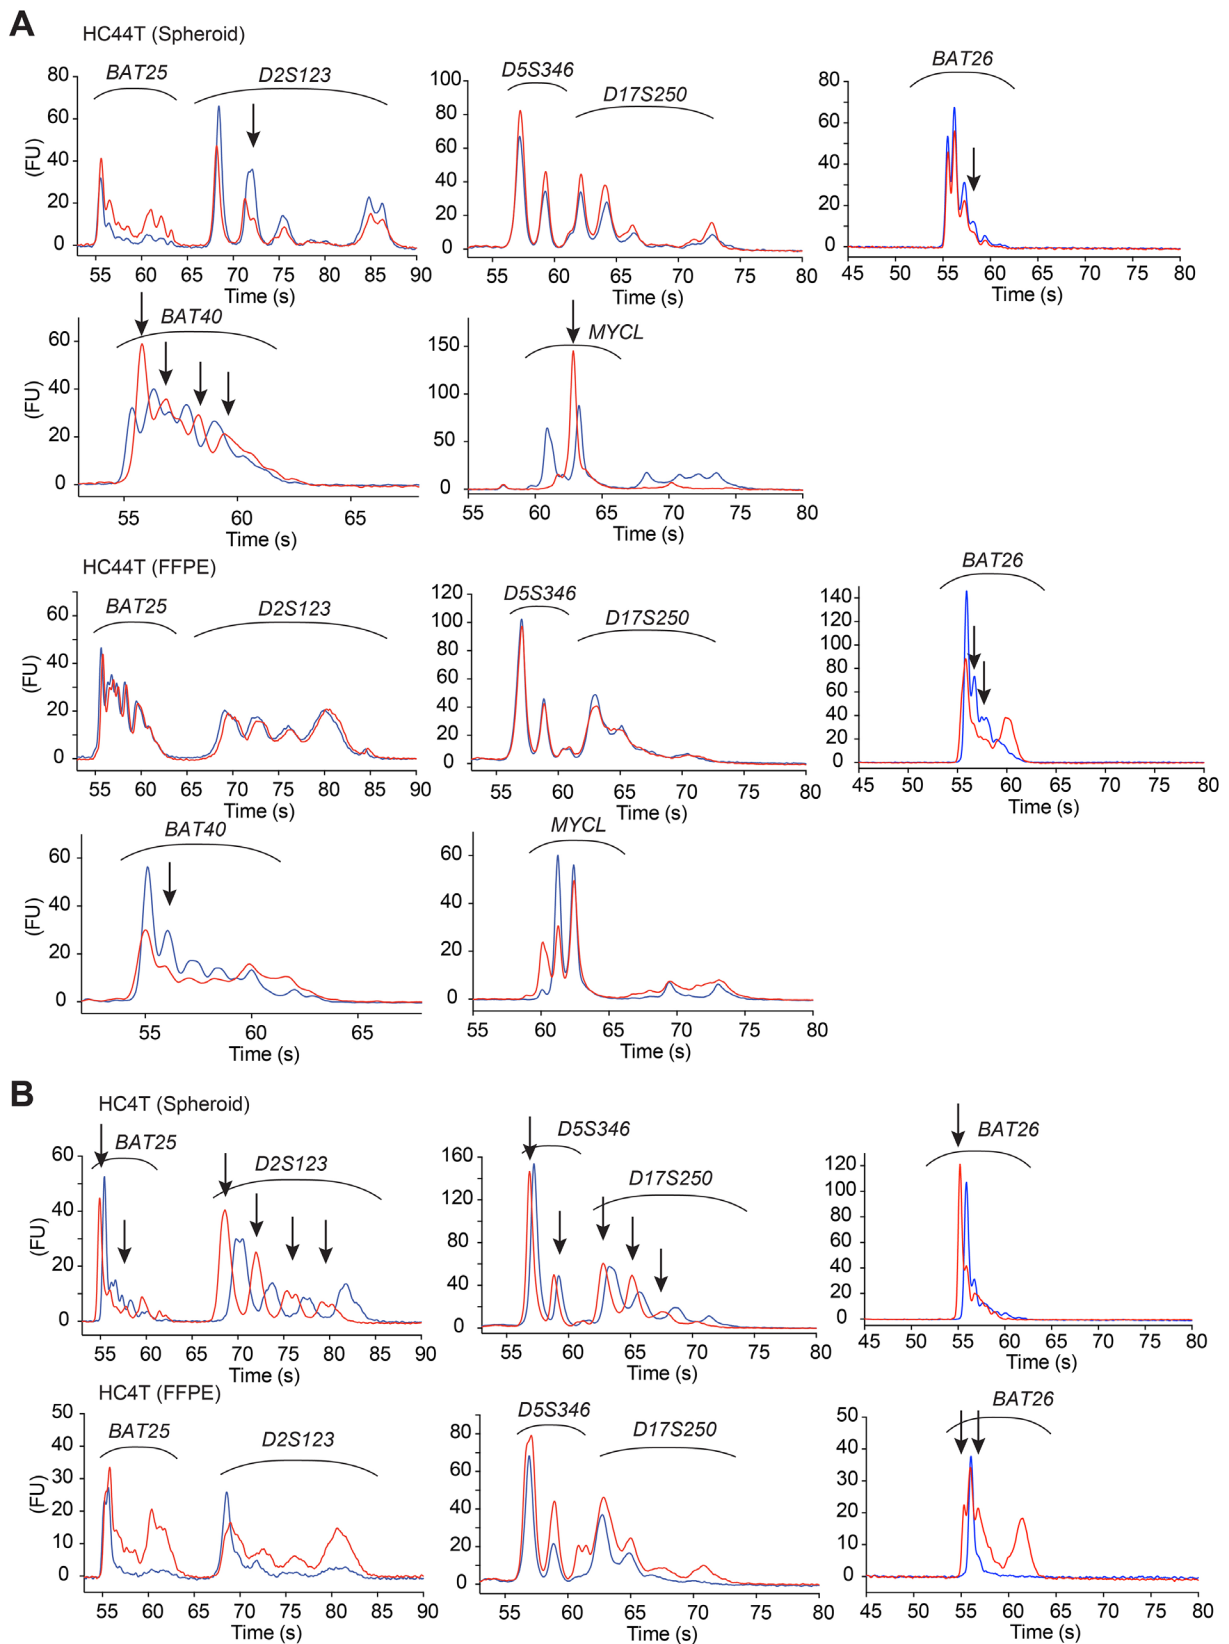

**Supplementary Figure 8: On-chip electropherograms of MSI markers amplified from colon cancer cases that showed discrepant results between spheroid- and FFPE tumor-derived DNA samples.** Discrepancies were found in two false-negative cases (Supplementary Figure 8, (A) HC44T and (B) HC4T) and one false-positive (Supplementary Figure 9; HC24T). For HC44T, the results with *BAT26* were difficult to be evaluated. Accordingly, additional markers were tested, leading to the final diagnosis of MSI-H. On the other hand, PCR amplifications of *BAT40* and *MYCL* on FFPE tumor-derived DNA samples of HC4T failed to produce analyzable-quality products, and therefore not shown in Supplementary Figure 8.

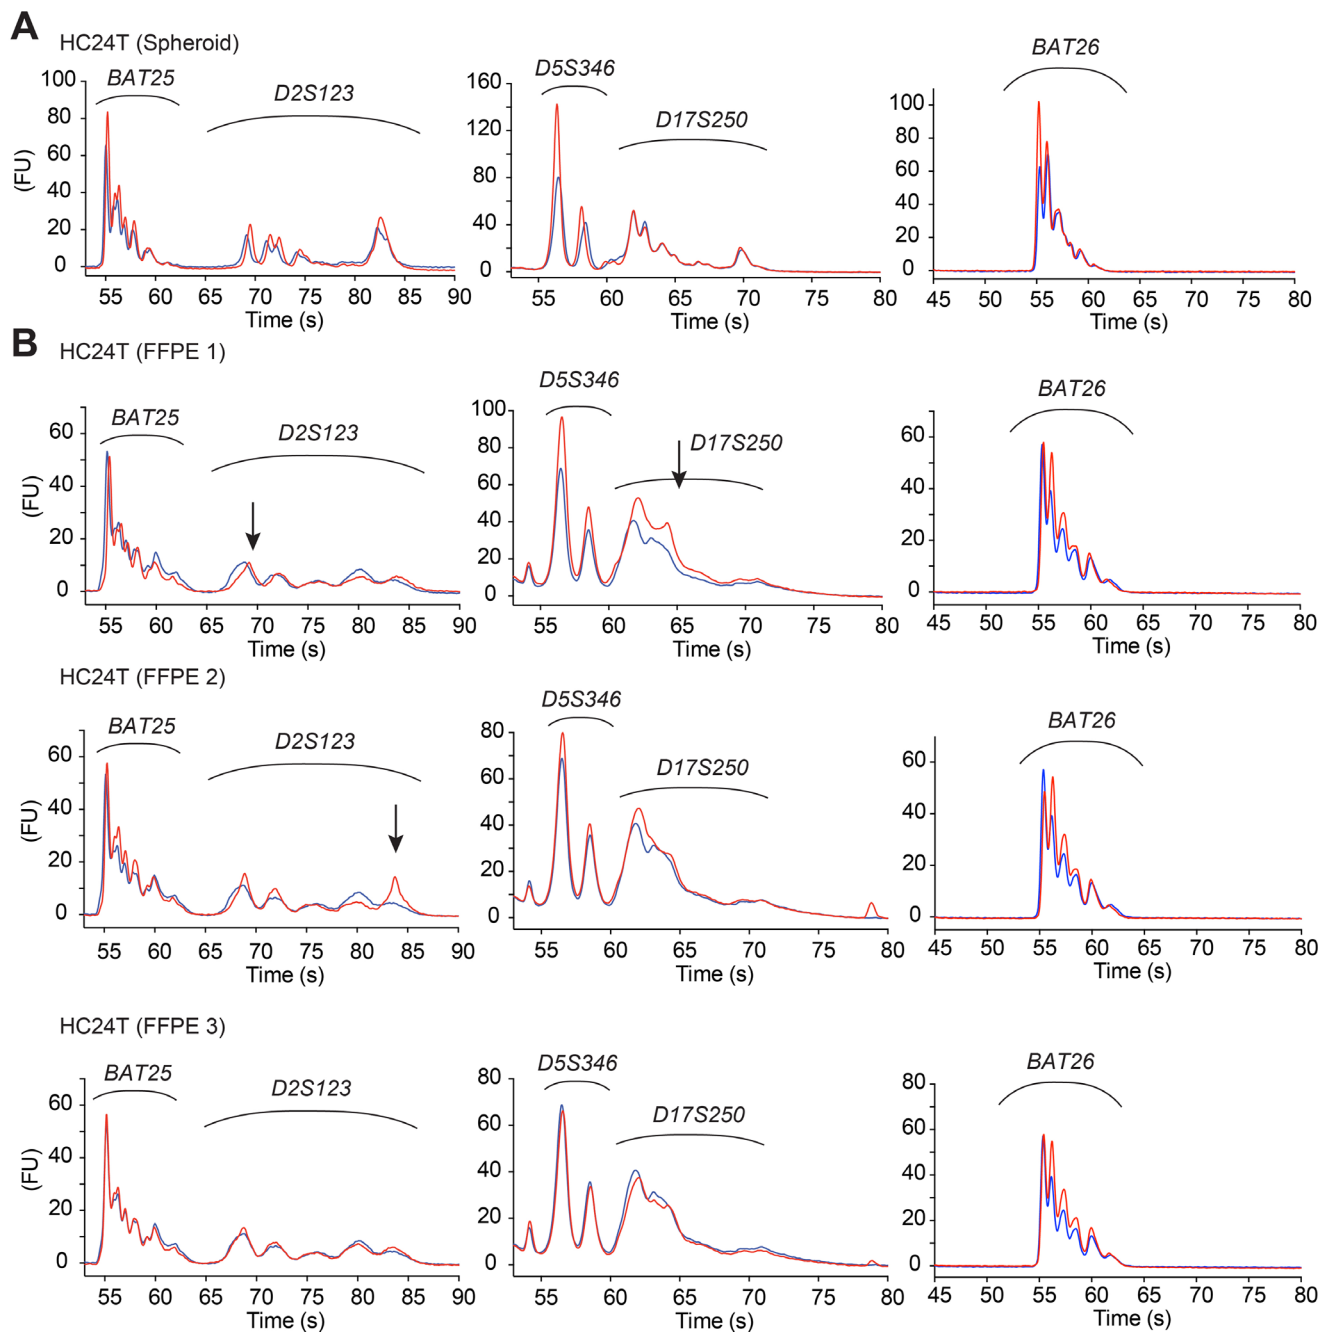

**Supplementary Figure 9: On-chip electropherograms of MSI markers amplified from colon cancer cases that showed discrepant results between spheroid- and FFPE tumor-derived DNA samples.** Discrepancies were found in two false-negative cases (Supplementary Figure 8) and one false-positive (Supplementary Figure 9; HC24T).



**Supplementary Table 1: Potential cancer-driving mutation list of all seven MSI-H cases.** See Supplementary\_Table\_1

**Supplementary Table 2: Potential cancer-driving mutation list of 11 MSI-L/MSS cases.** See Supplementary\_Table\_2

**Supplementary Table 3: Colorectal cancer cases that produced discrepant results between different DNA sources or IHC specimens**

| Case                       | On-chip                                     |                                | Sequencing of MMR deficiency target genes <sup>c</sup> |                                    |                                  |                                     | IHC                                              |                                        |
|----------------------------|---------------------------------------------|--------------------------------|--------------------------------------------------------|------------------------------------|----------------------------------|-------------------------------------|--------------------------------------------------|----------------------------------------|
|                            | MSI status <sup>a</sup> (Sph <sub>b</sub> ) | MSI status <sup>a</sup> (FFPE) | <i>TGFBR2</i> (WT: A <sub>10</sub> )                   | <i>IGF2R</i> (WT: G <sub>8</sub> ) | <i>BAX</i> (WT: G <sub>8</sub> ) | <i>CASP5</i> (WT: A <sub>10</sub> ) | Absent proteins <sup>d</sup> (Sph <sup>b</sup> ) | Absent proteins <sup>d</sup> (Primary) |
| HC13T <sup>c</sup>         |                                             |                                |                                                        |                                    |                                  |                                     |                                                  |                                        |
| Spheroid Clone 1           | MSS                                         |                                | WT/WT                                                  | WT/WT                              | WT/WT                            | WT/WT                               | None                                             |                                        |
| Spheroid Clone 2           | MSS                                         |                                | WT/WT                                                  | WT/WT                              | WT/WT                            | WT/WT                               | MLH1, PMS2                                       |                                        |
| FFPE 1 Sec. 5 <sup>f</sup> |                                             | MSS                            | WT                                                     |                                    | WT                               |                                     |                                                  | MLH1                                   |
| FFPE 2 Sec. 9 <sup>f</sup> |                                             | MSI-L                          | WT                                                     |                                    | WT                               |                                     |                                                  | MLH1, PMS2                             |
| HC44T                      | H                                           | L                              | WT/A <sub>11</sub>                                     | WT/WT                              | WT/G <sub>9</sub>                | WT/A <sub>9</sub>                   | MLH1, PMS2                                       | MLH1, PMS2                             |
| HC4T                       | H                                           | L                              | A <sub>9</sub> /A <sub>9</sub>                         | WT/G <sub>7</sub>                  | G <sub>7</sub> /G <sub>7</sub>   | A <sub>9</sub> /A <sub>9</sub>      | MLH1, PMS2                                       | MLH1, PMS2                             |
| HC24T                      | MSS                                         | H                              | WT/WT                                                  | WT/WT                              | WT/WT                            | WT/WT                               | None                                             | None                                   |
| HC106T <sup>g</sup>        | H                                           | L                              | A <sub>8</sub> /A <sub>9</sub>                         | WT/WT                              | WT/G <sub>9</sub>                | WT/WT                               | MLH1, PMS2                                       | MLH1, PMS2                             |

<sup>a</sup>H: MSI-High, L: MSI-Low

<sup>b</sup>Spheroid

<sup>c</sup>Only spheroid DNA data are shown, except in HC13T.

<sup>d</sup>Absent MMR proteins in immunohistochemical staining

<sup>e</sup>This case with the discrepant results between genetic analyses and IHC for MMR proteins.

<sup>f</sup>FFPE tissue sections of primary tumor (Supplementary Figure 6).

<sup>g</sup>This tumor was not included in the initial set of 50 cases of which DNA samples extracted from spheroids and FFPE tumors were compared.

**Supplementary Table 4: PCR primers used in this study**

| <b>Marker</b>  | <b>Primer pair (5' to 3')</b>                      | <b>Reference</b> |
|----------------|----------------------------------------------------|------------------|
| <i>BAT25</i>   | TCGCCTCCAAGAATGTAAGT<br>TCTGCATTTTAACTATGGCTC      | [34]             |
| <i>D2S123</i>  | AAACAGGATGCCTGCCTTTA<br>GGACTTCCACCTATGGGAC        | [34]             |
| <i>D5S346</i>  | ACTCACTCTAGTGATAAATCG<br>AGCAGATAAGACAGTATTACTAGTT | [34]             |
| <i>D17S250</i> | GGAAGAATCAAATAGACAAT<br>GCTGGCCATATATATATTTAAACC   | [34]             |
| <i>BAT26</i>   | TGACTACTTTTGACTTCAGCC<br>AACCATTCAACATTTTTAAACCC   | [34]             |
| <i>BAT40</i>   | ATTAACCTCCTACACCACAAC<br>GTAGAGCAAGACCACCTTG       | [34]             |
| <i>MYCL1</i>   | TGGCGAGACTCCATCAAAG<br>CTTTTTAAGCTGCAACAATTTC      | [34]             |
| <i>TGFBR2</i>  | TCCAATGAAT CTCTTCACTC<br>CCCACACCCT TAAGAGAAGA     | [35]             |
| <i>IGF2R</i>   | CAGGTCTCCT GACTCAGAAG<br>CTAATATGATCCCAGCAGCC      | This study       |
| <i>BAX</i>     | GGCTGCTGG GATCATATTAG<br>CCTCTGCAGC TCCATGTTAC     | This study       |
| <i>CASP5</i>   | GTGTTATTCGCTGGAGACATGG<br>CAAGATCAGGGCCTTGTCTTC    | This study       |

**Supplementary Table 5: PCR conditions used in this study**

| <b>Marker</b>         | <b>Enzyme</b>  | <b>Initial denaturation</b> | <b>Amplification</b>                                       | <b>Final elongation</b> |
|-----------------------|----------------|-----------------------------|------------------------------------------------------------|-------------------------|
| <i>BAT25/D2S123</i>   | M <sup>a</sup> | 95°C<br>(15 min)            | 94°C (30 sec) – 60°C (90 sec) – 72°C (60 sec)<br>35 cycles | 60°C<br>(30 min)        |
| <i>D5S346/D17S250</i> | M <sup>a</sup> | 95°C<br>(15 min)            | 94°C (30 sec) – 50°C (90 sec) – 72°C (60 sec)<br>35 cycles | 60°C<br>(30 min)        |
| <i>BAT26</i>          | M <sup>a</sup> | 95°C<br>(15 min)            | 94°C (30 sec) – 60°C (90 sec) – 72°C (60 sec)<br>35 cycles | 60°C<br>(30 min)        |
| <i>BAT40</i>          | M <sup>a</sup> | 95°C<br>(15 min)            | 94°C (30 sec) – 55°C (90 sec) – 72°C (60 sec)<br>35 cycles | 60°C<br>(30 min)        |
| <i>MYCL1</i>          | M <sup>a</sup> | 95°C<br>(15 min)            | 94°C (30 sec) – 55°C (90 sec) – 72°C (60 sec)<br>35 cycles | 60°C<br>(30 min)        |
| <i>TGFBR2</i>         | P <sup>b</sup> | 95°C<br>(3 min)             | 98°C (10 sec) – 60°C (5 sec) – 72°C (30 sec)<br>35 cycles  | 60°C<br>(10 min)        |
|                       | J <sup>c</sup> | 95°C<br>(1 min)             | 94°C (30 sec) – 50°C (30 sec) – 72°C (30 sec)<br>35 cycles | 72°C<br>(10 min)        |
| <i>IGF2R</i>          | J <sup>c</sup> | 95°C<br>(1 min)             | 94°C (30 sec) – 65°C (30 sec) – 72°C (30 sec)<br>35 cycles | 72°C<br>(10 min)        |
| <i>BAX</i>            |                |                             |                                                            |                         |
| <i>CASP5</i>          |                |                             |                                                            |                         |

<sup>a</sup>Multiplex PCR Kit (Qiagen)

<sup>b</sup>PrimeSTAR Max DNA Polymerase (Takara)

<sup>c</sup>JumpStart Taq DNA Polymerase (Sigma)
